# Supplementary material for: IL3 Has a Detrimental Effect on Hematopoietic Stem Cell Self-Renewal in Transplantation Settings
Source: MDPI journal article supplement (doi:10.3390/ijms232112736), 2022-10-22
Supplement: s1 [file s1]

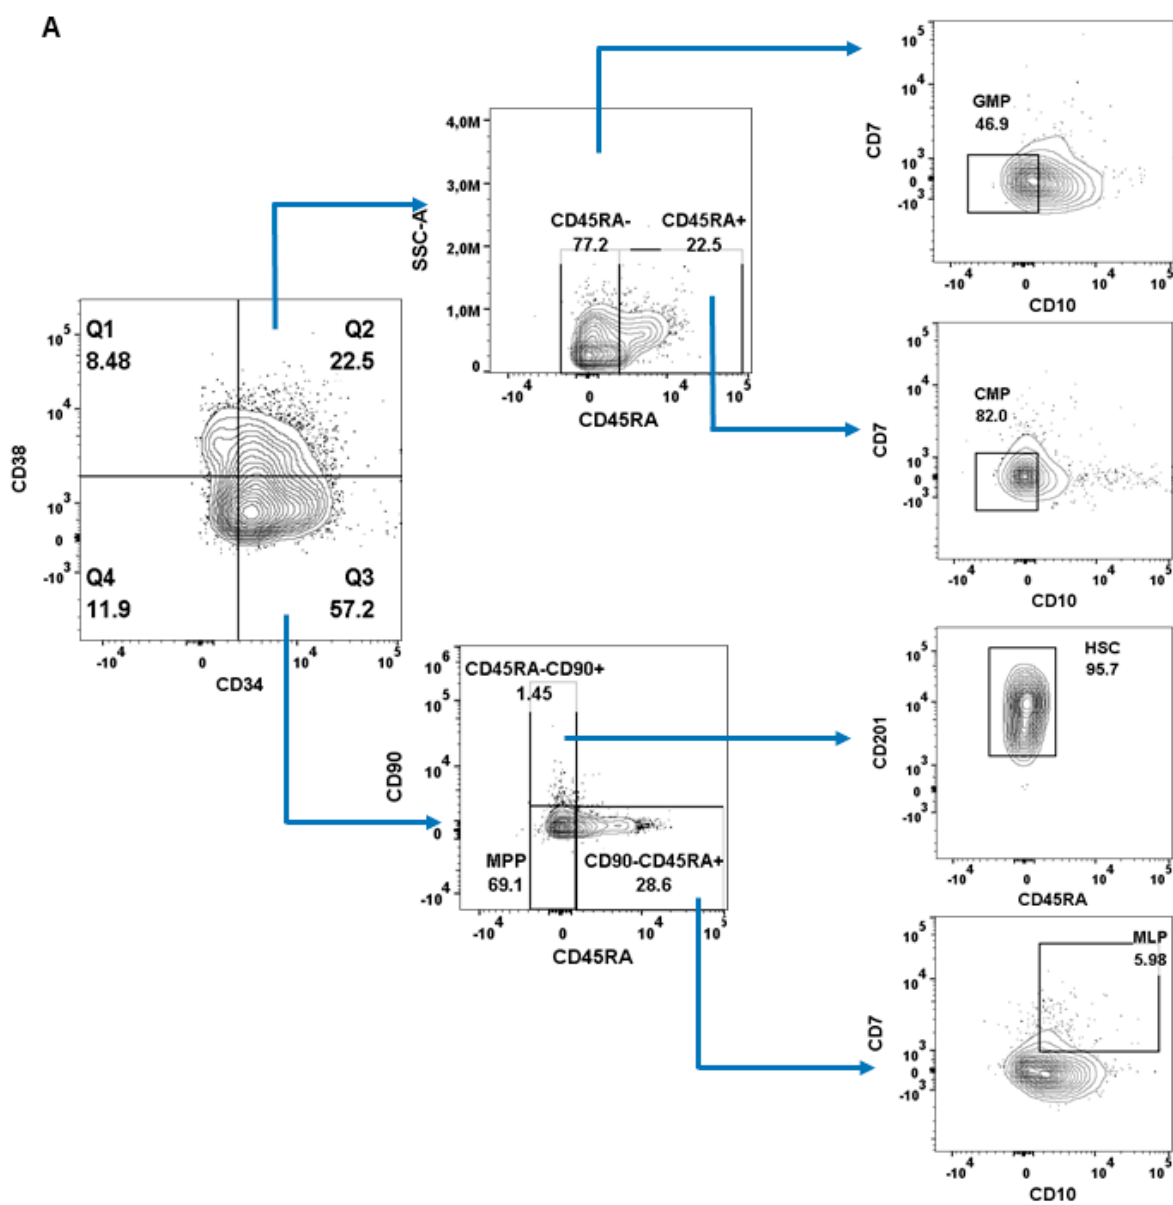

B

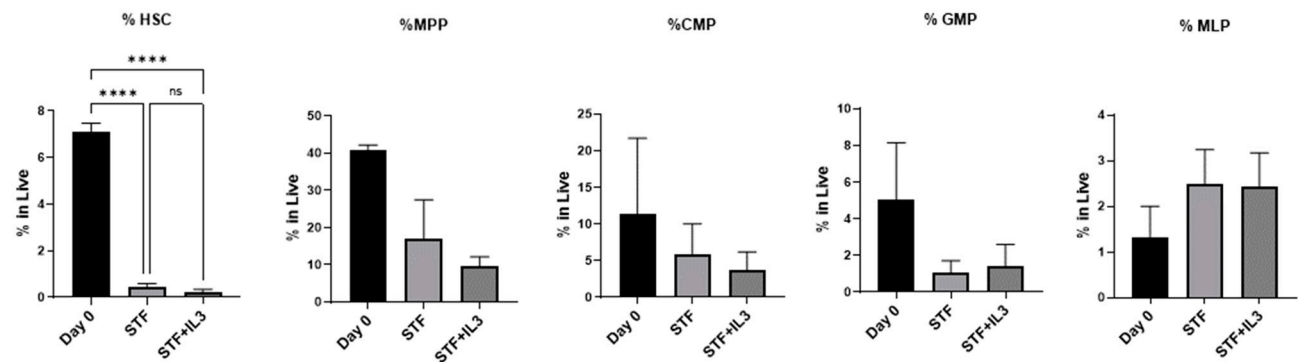

C

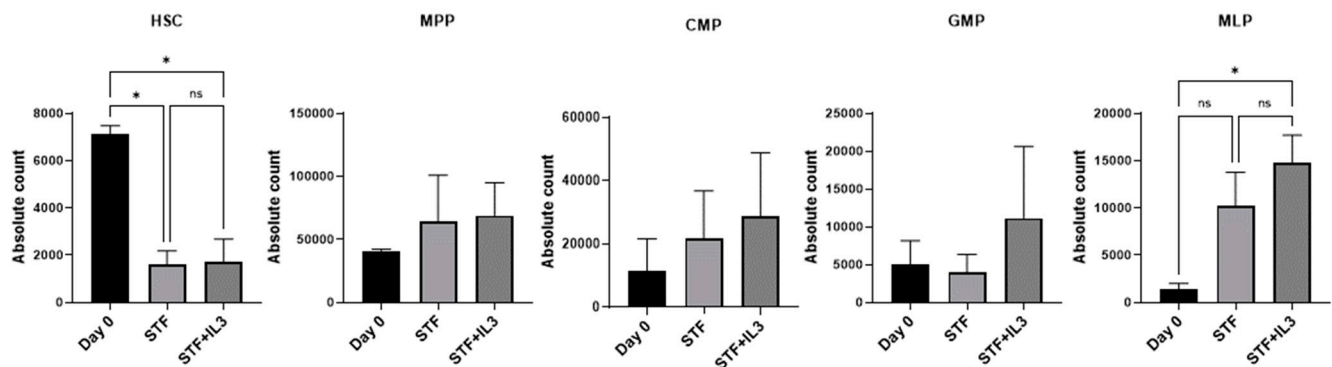

**Supplementary Figure S1. Percentages and absolute count of hematopoietic stem cells and progenitors (HSPCs).** (A) Representative gating strategy for phenotypic analysis of HSPCs. Hematopoietic stem cell (HSC): CD34<sup>+</sup>CD38<sup>-</sup>CD90<sup>+</sup>CD45RA<sup>-</sup>CD201<sup>+</sup>, Multipotent Progenitor (MPP): CD34<sup>+</sup>CD38<sup>-</sup>CD45RA<sup>-</sup>CD90<sup>-</sup>, Multi-lymphoid Progenitor (MLP): CD34<sup>+</sup>CD38<sup>-</sup>CD45RA<sup>+</sup>CD90<sup>-</sup>CD10<sup>+</sup>CD7<sup>+</sup>, Common Myeloid Progenitor (CMP): CD34<sup>+</sup>CD38<sup>+</sup>CD45RA<sup>+</sup>CD10<sup>-</sup>CD7<sup>-</sup>, Granulocyte-Macrophage Progenitor (GMP): CD34<sup>+</sup>CD38<sup>+</sup>CD45RA<sup>+</sup>CD10<sup>-</sup>CD7<sup>-</sup>. (B) Percentage (C) and absolute cell counts of the different progenitor populations at day 0 and day 4 (n=3, \*p<0,05, \*\*p<0,01 and \*\*\*p<0,001, one-way Anova).

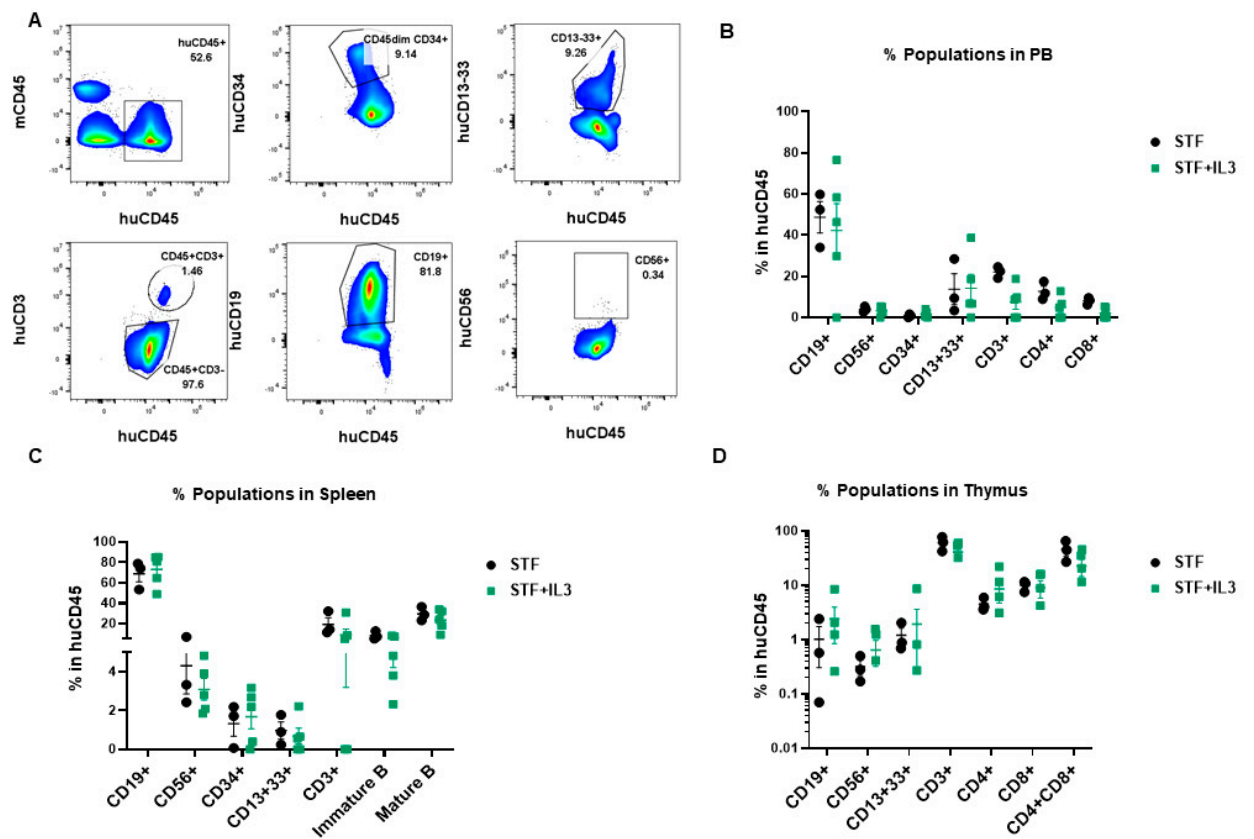

**Supplementary Figure S2. Human engraftment in organs from primary transplanted NSG mice.** (A) Representative of flow cytometry analysis strategy in bone marrow at week 20 post-transplantation of different populations within huCD45<sup>+</sup>. (B-D) Percentages of different populations in PB, Thymus and Spleen.

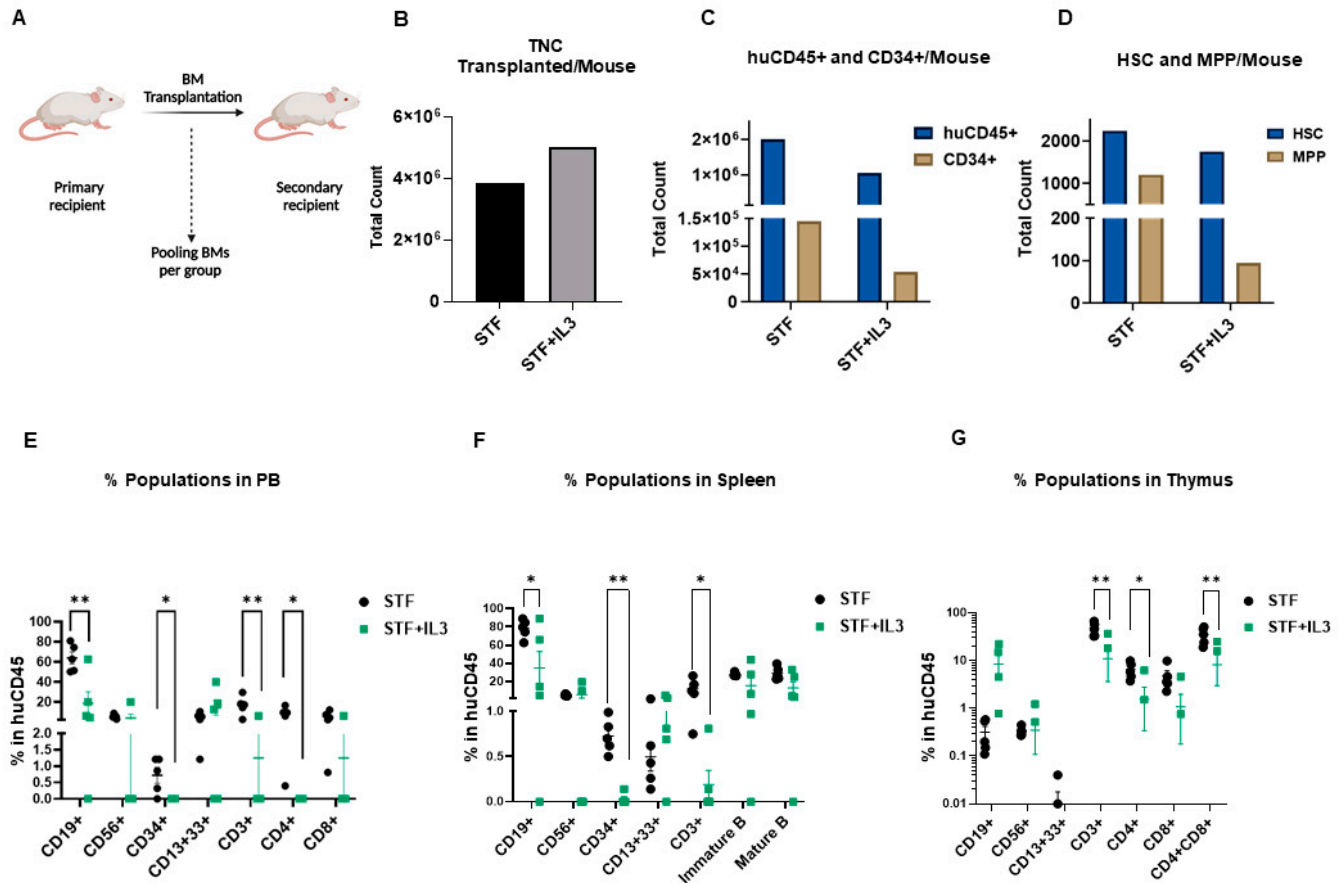

**Supplementary Figure S3. Human engraftment in organs from secondary transplanted NSG mice.** (A) Schematic picture of secondary transplantation. (B) Total nucleated cells (TNC) transplanted per mouse in each group. (C) Total count of huCD45<sup>+</sup> and CD34<sup>+</sup> cells that each mouse received per group. (D) Graph shows total count of HSC and MPP each mouse received per group at the time of secondary transplantation. (E-G) Engraftment of different populations in PB, Thymus and Spleen at week 20 post-transplantation (n=5; \*p<0,05, \*\*p<0,01 and \*\*\*p<0,001, unpaired t-test).

| Name    | Fluorochrome | Clone    | Source         |
|---------|--------------|----------|----------------|
| hCD1a   | APC          | HI149    | BD Biosciences |
| hCD3    | BV786        | SK7      | BD Biosciences |
| hCD4    | BUV805       | SK3      | BD Biosciences |
| hCD5    | BV480        | UCHT2    | BD Biosciences |
| hCD7    | Pe-Cy5       | CD7-6B7  | Biolegend      |
| hCD8    | BV650        | RPA-T8   | Biolegend      |
| hCD8    | BUV496       | RPA-T8   | BD Biosciences |
| hCD10   | APC-Cy7      | HI10a    | Biolegend      |
| hCD13   | PerCP-Cy5.5  | WM15     | BD Biosciences |
| hCD19   | PE-Cy7       | HIB19    | Invitrogen     |
| hCD19   | BV421        | HIB19    | Biolegend      |
| hCD20   | BV570        | 2H7      | Biolegend      |
| hCD33   | PerCP-Cy5.5  | WM53     | BD Biosciences |
| hCD34   | Pe-CF594     | 581      | BD Biosciences |
| hCD34   | BV650        | 561      | Biolegend      |
| hCD38   | Pe-Cy7       | HIT2     | Biolegend      |
| hCD41   | BV421        | HIP8     | Biolegend      |
| hCD45   | V450         | HI30     | BD Biosciences |
| hCD45RA | BV711        | HI100    | Biolegend      |
| hCD45RA | BV510        | HI100    | BD Biosciences |
| hCD49f  | PerCP-ef710  | ebioGoH3 | Invitrogen     |
| hCD56   | PE-Cy5       | B159     | BD Biosciences |
| hCD56   | APC-Cy7      | HCD-56   | Biolegend      |
| hCD62L  | BV605        | DREG-56  | BD Biosciences |
| hCD71   | AF700        | M-A712   | BD Biosciences |
| hCD90   | APC          | 5 e10    | Biolegend      |

|               |       |         |                |
|---------------|-------|---------|----------------|
| hCD201        | PE    | RCR-401 | Biolegend      |
| hIgM          | BV650 | MHM-88  | BD Biosciences |
| hIgD          | BV480 | IA6-2   | BD Biosciences |
| hTCRgd        | BV510 | 11F2    | BD Biosciences |
| hTCRab        | PE    | MHM-88  | BD Biosciences |
| mCD45         | FITC  | 30-F11  | BD Biosciences |
| Zombie<br>NIR | NIR   | -       | Biolegend      |

**Supplementary Table S1: List of antibodies used.**
